# Supplementary material for: 3D nitrogen-doped graphene gels as robust and sustainable adsorbents for dyes
Source: Royal Society of Chemistry journal article supplement (doi:10.1039/c7nj02984e), 2017-01-01
Supplement: c7nj02984e1.pdf [file c7nj02984e1.pdf]

## Supporting Information

### **3D nitrogen doped graphene gels as robust and sustainable adsorbents for dyes**

Jiyu Geng,<sup>a</sup> Leilei Si,<sup>a</sup> Haotian Guo,<sup>a</sup> Chenhui Lin,<sup>a</sup> Ye Xi,<sup>a</sup> Yang Li,<sup>abc</sup> Xilong Yan,<sup>abc</sup> Bawei Wang,<sup>ab\*</sup> Ligong Chen<sup>abc\*</sup>

<sup>a</sup> School of Chemical Engineering and Technology, Tianjin University, Tianjin 300350, P. R. China.

<sup>b</sup> Collaborative Innovation Center of Chemical Science and Engineering (Tianjin), Tianjin 300072, P. R. China.

<sup>c</sup> Tianjin Engineering Research Center of Functional Fine Chemicals, Tianjin, P. R. China.

\* Corresponding author. E-mail: [bwwang@tju.edu.cn](mailto:bwwang@tju.edu.cn) (Bawei Wang); [lgchen@tju.edu.cn](mailto:lgchen@tju.edu.cn) (Ligong Chen)

Reduced graphene oxide (rGO) was prepared by the similar method with glycol and hexanediol in the place of hexamethylenediamine and 1, 12-diaminododecane, denoted as rGO-2 and rGO-6, respectively.

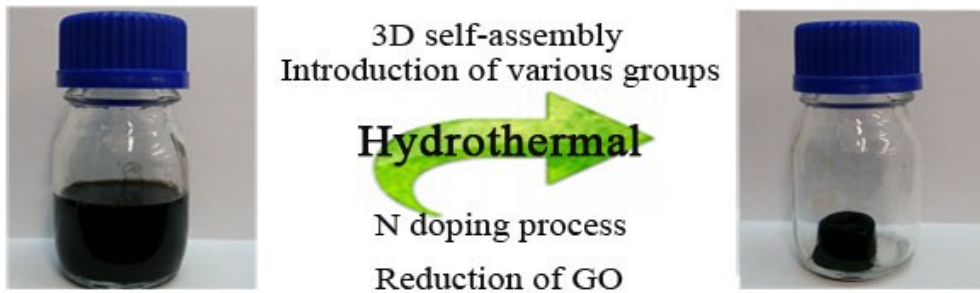

Fig. S1. Fabrication process pattern of NG gel.

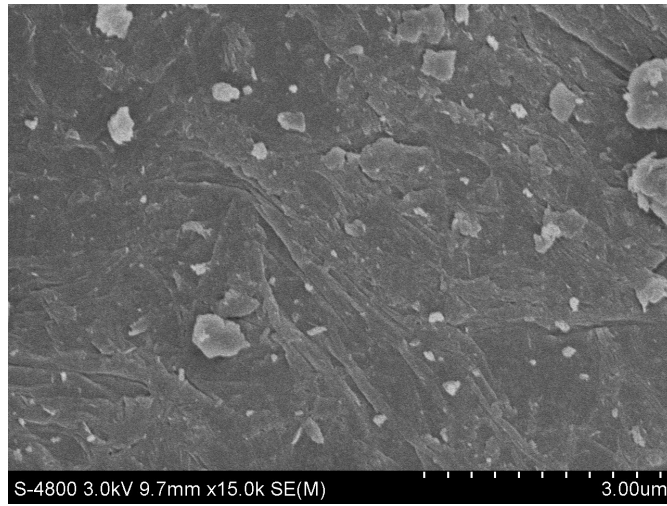

Fig. S2. SEM image of GO.

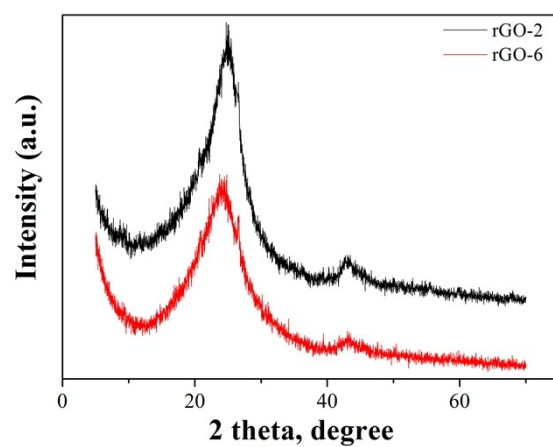

Fig. S3. XRD patterns of rGO-2 and rGO-6.

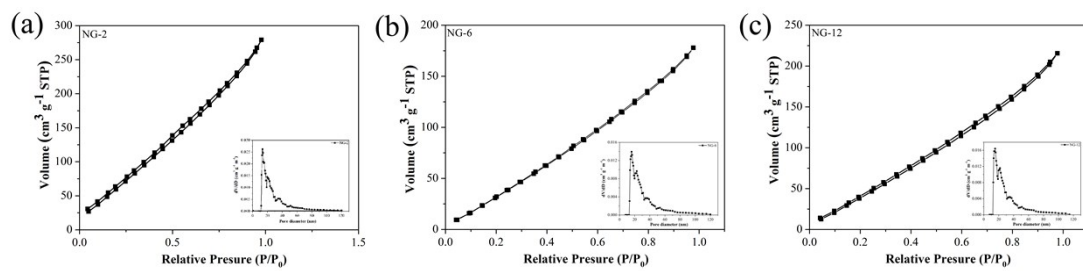

Fig. S4  $N_2$  adsorption-desorption isotherms and pore size distribution of NG samples: (a) NG-2; (b) NG-6; (c) NG-12.

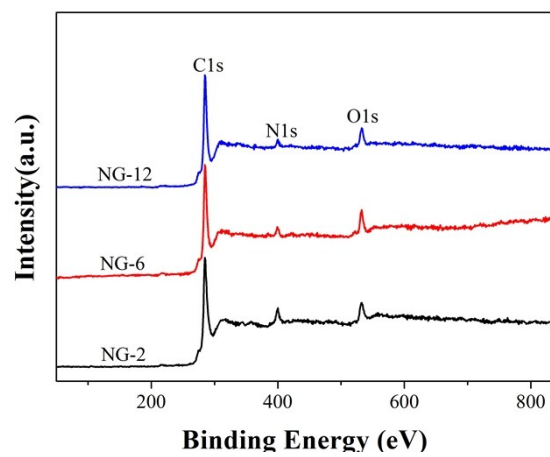

Fig. S5 XPS survey of NG samples

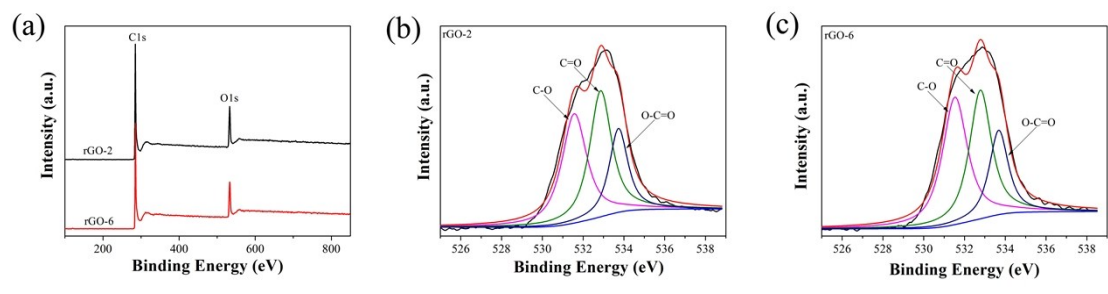

Fig. S6 High-resolution XPS spectra of (a) rGO samples and O 1s region for (b) rGO-2, (c) rGO-6.

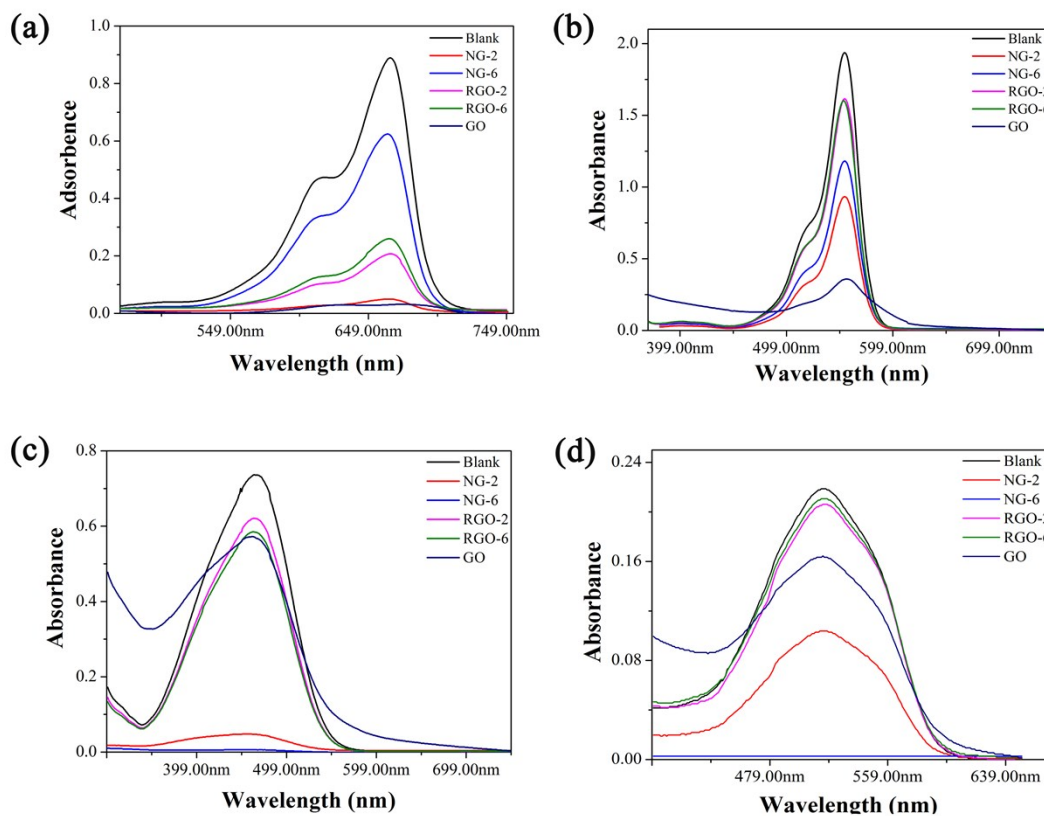

Fig. S7 UV-vis adsorption spectra of different dye solutions: (a) MB, (b) RhB, (c) MO and (d) AR after various adsorbents adsorption for 12 h.

Table S1 Comparison of adsorption values of GO, RGO and NG for adsorption of different dyes.

|       | MB(mg g <sup>-1</sup> ) | RhB( mg g <sup>-1</sup> ) | AR( mg g <sup>-1</sup> ) | MO( mg g <sup>-1</sup> ) |
|-------|-------------------------|---------------------------|--------------------------|--------------------------|
| GO    | 124.49                  | 98.58                     | 24.90                    | 19.17                    |
| RGO-2 | 79.19                   | 27.43                     | 5.77                     | 12.81                    |
| RGO-6 | 73.02                   | 28.98                     | 3.72                     | 16.80                    |
| NG-2  | 108.89                  | 63.83                     | 52.66                    | 60.64                    |
| NG-6  | 52.92                   | 36.84                     | 174.86                   | 161.31                   |
| NG-12 | 5.58                    | 8.67                      | 64.75                    | 72.85                    |



Table S2 Kinetics parameters of NG-2 and GO for the adsorption of MB and RhB.

| Kinetic model       | Parameters                                                       | MB     |        | RhB    |        |
|---------------------|------------------------------------------------------------------|--------|--------|--------|--------|
|                     |                                                                  | NG-2   | GO     | NG-2   | GO     |
| Pseudo-first-order  | $q_e$ (mg g <sup>-1</sup> )                                      | 110.09 | 124.49 | 64.06  | 98.58  |
|                     | $k_1$ (h <sup>-1</sup> )                                         | 0.12   | 0.10   | 0.14   | 0.13   |
|                     | $R^2$                                                            | 0.9999 | 0.9970 | 0.9993 | 0.9988 |
| Pseudo-second-order | $q_e$ (mg g <sup>-1</sup> )                                      | 108.34 | 56.12  | 107.07 | 13.12  |
|                     | $k_2$ (g (mg <sup>-1</sup> h <sup>-1</sup> )) × 10 <sup>-3</sup> | 1.43   | 3.90   | 0.46   | 16.52  |
|                     | $R^2$                                                            | 0.9791 | 0.9641 | 0.9235 | 0.9662 |

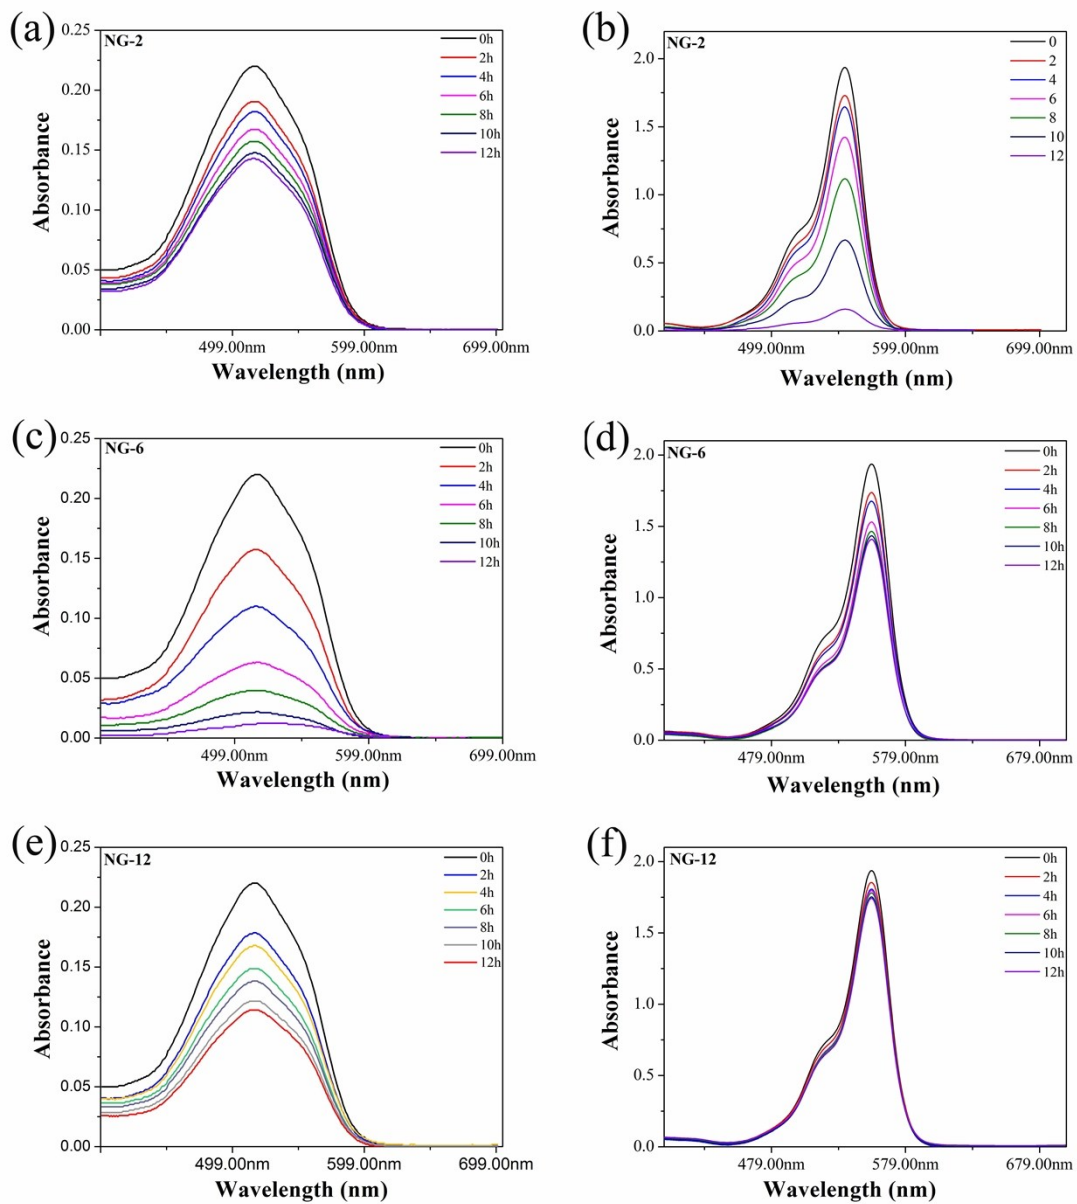

Fig. S8 UV-vis adsorption spectra of AR solutions after (a) NG-2, (c) NG-6 and (e) NG-12; RhB solutions after (b) NG-2, (d) NG-6 and (f) NG-12 adsorption for 12 h.

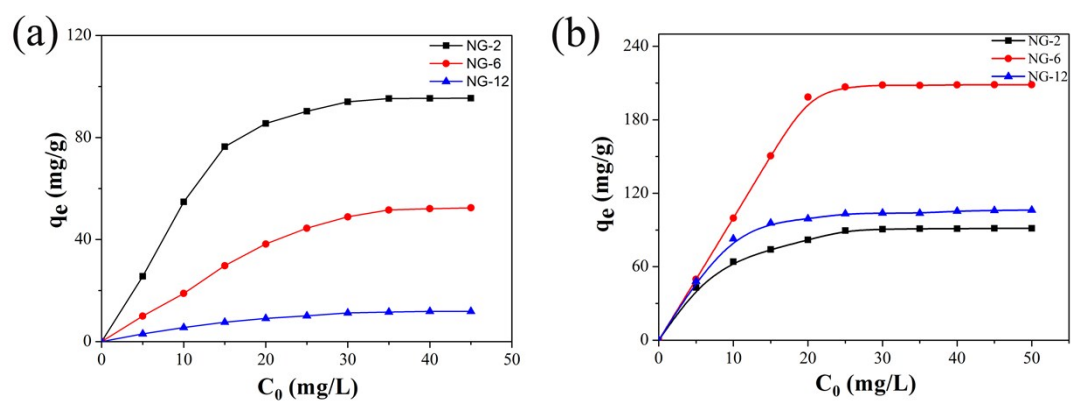

Fig. S9 Adsorption curves of (a) RhB and (b) AR on NG-2, NG-6 and NG-12.

Table S3 Langmuir and Freundlich isotherm parameters of NG-2, NG-6 and NG-12.

| Isotherm model | Parameters                   | RhB    |        |        | AR     |        |        |
|----------------|------------------------------|--------|--------|--------|--------|--------|--------|
|                |                              | NG-2   | NG-6   | NG-12  | NG-2   | NG-6   | NG-12  |
| Langmuir       | $q_m$ ( $\text{mg g}^{-1}$ ) | 72.45  | 54.49  | 9.65   | 92.17  | 208.80 | 106.05 |
|                | $K_L$ ( $\text{L mg}^{-1}$ ) | 0.08   | 0.10   | 0.15   | 0.90   | 9.70   | 1.30   |
|                | $R_L$                        | 0.3846 | 0.3333 | 0.2500 | 0.0528 | 0.0005 | 0.0372 |
|                | $R^2$                        | 0.9985 | 0.9992 | 0.9987 | 0.9985 | 0.9940 | 0.9966 |
| Freundlich     | $K_F$ ( $\text{mg g}^{-1}$ ) | 1.52   | 2.87   | 15.82  | 31.67  | 262.42 | 40.64  |
|                | $(\text{L mg}^{-1})^{1/n}$   |        |        |        |        |        |        |
|                | $n$                          | 4.75   | 3.45   | 0.97   | 2.56   | 7.50   | 3.07   |
|                | $R^2$                        | 0.9634 | 0.9816 | 0.9978 | 0.8892 | 0.8141 | 0.8164 |

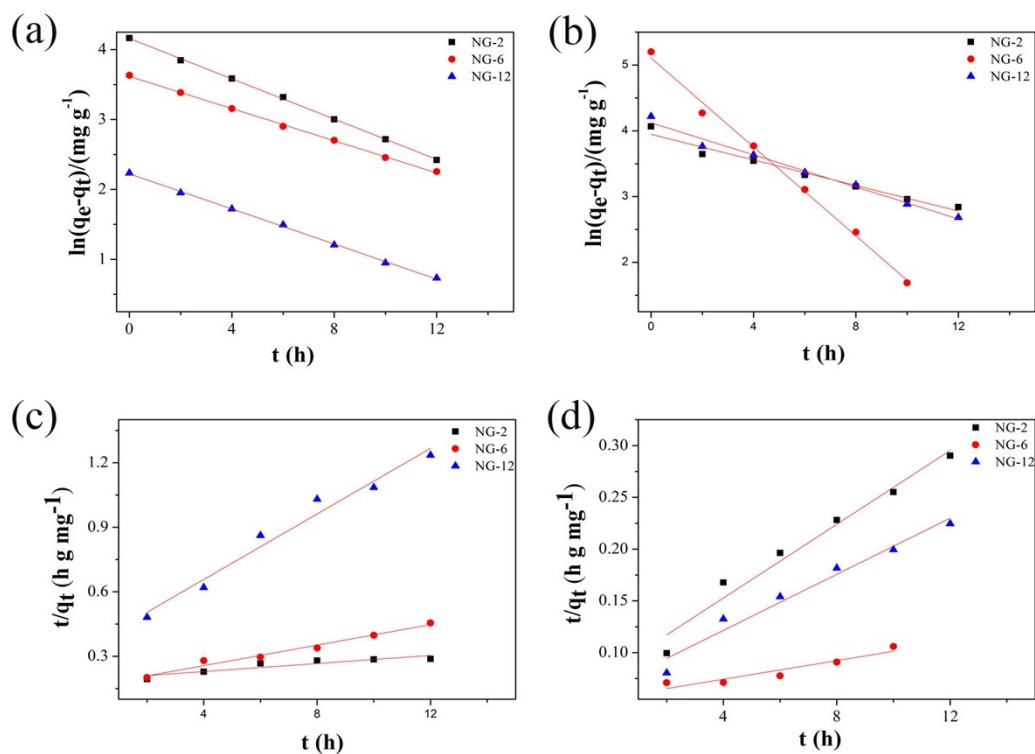

Fig. S10 Pseudo-first-order kinetic plots with (a) RhB, (b) AR on NG-2, NG-6 and NG-12; pseudo-second-order kinetic plots: (c) RhB, (d) AR on NG-2, NG-6 and NG-12.

Table S4 Kinetics parameters of NG-2, NG-6 and NG-12 for the adsorption of RhB and AR.

| Kinetic model       | Parameters                                                           | RhB    |        |        | AR     |        |        |
|---------------------|----------------------------------------------------------------------|--------|--------|--------|--------|--------|--------|
|                     |                                                                      | NG-2   | NG-6   | NG-12  | NG-2   | NG-6   | NG-12  |
| Pseudo-first-order  | $q_e$ ( $\text{mg g}^{-1}$ )                                         | 64.06  | 37.26  | 9.24   | 53.96  | 178.34 | 64.94  |
|                     | $k_1$ ( $\text{h}^{-1}$ )                                            | 0.14   | 0.12   | 0.13   | 0.10   | 0.35   | 0.13   |
|                     | $R^2$                                                                | 0.9993 | 0.9989 | 0.9988 | 0.9970 | 0.9993 | 0.9982 |
| Pseudo-second-order | $q_e$ ( $\text{mg g}^{-1}$ )                                         | 107.07 | 41.95  | 13.12  | 56.12  | 222.72 | 73.75  |
|                     | $k_2$ ( $\text{g}(\text{mg}^{-1}\text{h}^{-1}))$<br>$\times 10^{-3}$ | 0.46   | 3.53   | 16.52  | 3.90   | 0.36   | 2.73   |
|                     | $h_0$                                                                | 5.27   | 6.21   | 2.84   | 12.28  | 17.86  | 14.85  |
|                     | $R^2$                                                                | 0.9235 | 0.9887 | 0.9662 | 0.9641 | 0.8545 | 0.9600 |

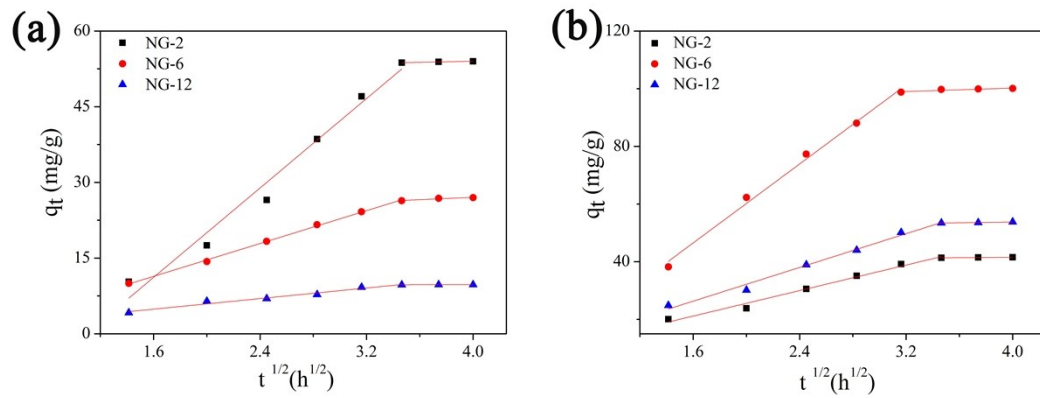

Fig. S11 Intra-particle diffusion kinetics plots with (a) RhB and (b) AR on NG-2, NG-6 and NG-12.

Table S5 Intra-particle diffusion model parameters for adsorption of RhB and AR .

| Parameters                                      | RhB    |        |        | AR     |        |        |
|-------------------------------------------------|--------|--------|--------|--------|--------|--------|
|                                                 | NG-2   | NG-6   | NG-12  | NG-2   | NG-6   | NG-12  |
| $k_i$ (mg (g h <sup>1/2</sup> ) <sup>-1</sup> ) | 21.73  | 9.47   | 2.62   | 11.06  | 35.06  | 14.63  |
| C (mg g <sup>-1</sup> )                         | 23.52  | 1.66   | 0.69   | 3.44   | 15.53  | 2.90   |
| R <sup>2</sup>                                  | 0.9734 | 0.9656 | 0.9677 | 0.9835 | 0.9515 | 0.9872 |
